# Supplementary material
Source: publisher site journal article supplement (https://www.spandidos-publications.com/952/downloadSupplementary)

Figure S1. Survival rates of treated cells. Survival rates of (A) HL-60 and (B) Vero cells following treatment with 50  $\mu$ M of each indicated compound for 48 h. PBS-treated cells. \*\*\*P<0.001 vs. PBS-treated cells.

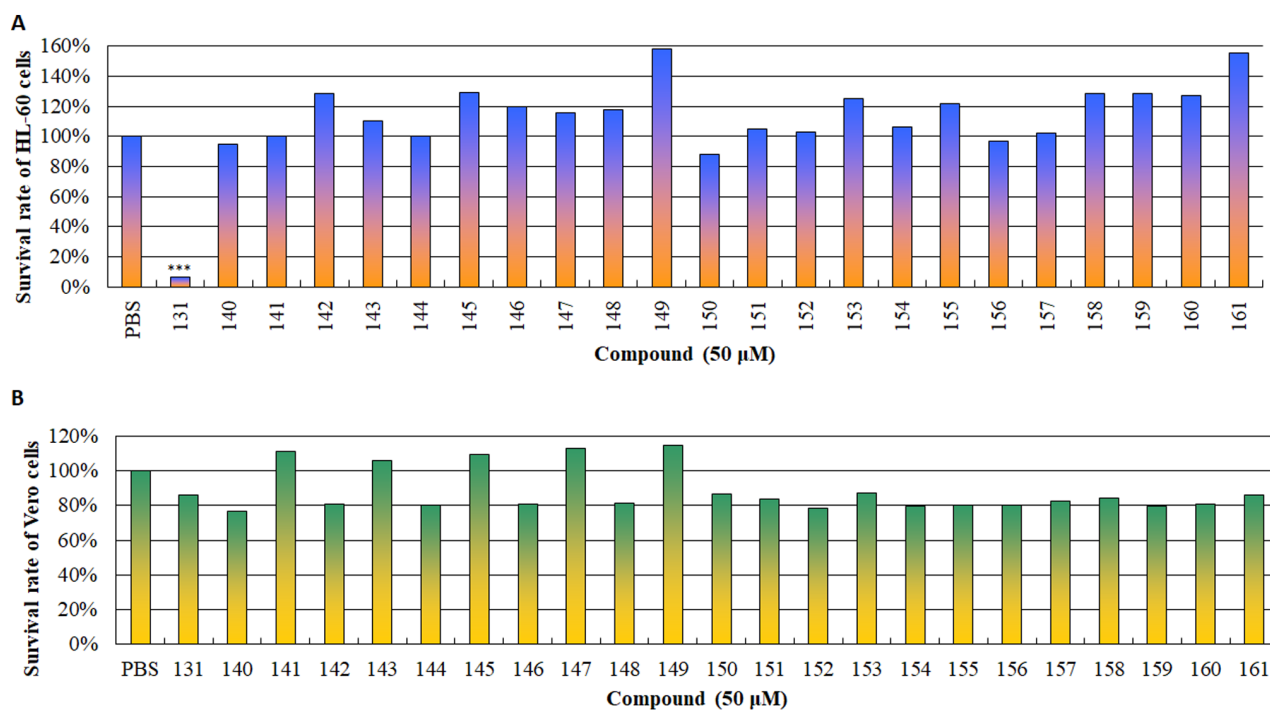

Supplement: Supplementary file 1 [file downloadSupplementary]
